# Supplementary material for: Estimated global and regional causes of deaths from diarrhoea in children younger than 5 years during 2000–21: a systematic review and Bayesian multinomial analysis
Source: PubMed Central journal article supplement (PMC11099298; doi:10.1016/s2214-109x(24)00078-0), 2024-04-20
Supplement: mmc1.pdf [file mmc1.pdf]

# THE LANCET

## Global Health

### Supplementary appendix 1

This appendix formed part of the original submission and has been peer reviewed. We post it as supplied by the authors.

Supplement to: Black RE, Perin J, Yeung D, et al. Estimated global and regional causes of deaths from diarrhoea in children younger than 5 years during 2000–21: a systematic review and Bayesian multinomial analysis. *Lancet Glob Health* 2024; published online April 19. [https://doi.org/10.1016/S2214-109X\(24\)00078-0](https://doi.org/10.1016/S2214-109X(24)00078-0).

## Contents

|                                                                                                                                        |    |
|----------------------------------------------------------------------------------------------------------------------------------------|----|
| <b>Web Appendix Full search strategy (Pubmed)</b> .....                                                                                | 2  |
| <b>Web Appendix PRIMSA Checklist 2020</b> .....                                                                                        | 3  |
| <b>Web appendix Figure 1. Location of included studies</b> .....                                                                       | 6  |
| <b>Web Appendix Table 1. Description of study (input) data by country income level</b> .....                                           | 7  |
| <b>Web Appendix Table 2. Choice of GEMS or MAL-ED datasets for scalar derivation for each pathogen</b> .....                           | 7  |
| <b>Web Appendix Table 3. Description of diagnostic methods in study (input) data</b> .....                                             | 8  |
| <b>Web Appendix Figure 2. Comparison of before and after scalars</b> .....                                                             | 9  |
| <b>Web Appendix Statistical Methods. Details related to statistical methods</b> .....                                                  | 11 |
| <b>Web Appendix Figure 3. Model coefficient estimates</b> .....                                                                        | 13 |
| <b>Web Appendix Figure 4. Convergence for high income model</b> .....                                                                  | 15 |
| <b>Web Appendix Figure 5. Convergence for low and middle-income model</b> .....                                                        | 18 |
| <b>Web Appendix Table 4. Comparison of Previous<sup>6,11,25</sup> and current estimates of the etiologies of diarrhea deaths</b> ..... | 22 |

## Web Appendix Full search strategy (Pubmed)

Search Group 1 (child) AND Search Group 2 (diarrhea) AND Search Group 3 (hospital)

1. Child

"infant"[mh] OR "Infant, Newborn"[mh] OR "Infant, Premature"[mh] OR "Child"[mh] OR "Child, Preschool"[mh] OR "Minors"[mh] OR "infant"[tw] "infants"[tw] OR "neonate"[tw] OR "neonates"[tw] OR "neonatal"[tw] OR "newborn"[tw] OR "newborns"[tw] OR "new-born"[tw] OR "new-borns"[tw] OR "babies"[tw] OR "baby"[tw] OR "Premature"[tw] OR "preterm"[tw] OR "pre term"[tw] OR "child"[tw] OR "children"[tw] OR "youth"[tw] OR "youths"[tw] OR "young people"[tw] OR "childhood"[tw] OR "toddler"[tw] OR "toddlers"[tw] OR "kid"[tw] OR "kids"[tw] OR "young patient"[tw] OR "young patients"[tw] OR "boy"[tw] OR "boys"[tw] OR "girl"[tw] OR "girls"[tw] OR "young age"[tw] OR "pediatric"[tw] OR "pre-schooler"[tw] OR "preschooler"[tw] OR "under 5"[tw] OR "under five"[tw] OR "under fives"[tw] OR "less than five"[tw] OR "perinatal"[tw]

2. Diseases

"Diarrhea"[mh] OR "gastroenteritis"[mh] OR "Cholera"[mh] OR "dysentery"[mh] OR "Rotavirus"[mh] OR "Escherichia coli"[mh] OR "Salmonella"[mh] OR "Shigella"[mh] OR "Campylobacter"[mh] OR "Giardia lamblia"[mh] OR "Vibrio cholerae"[mh] OR "Cryptosporidium"[mh] OR "Norwalk virus"[mh] OR "Avastrovirus"[mh] OR "Coronavirus"[mh] OR "Adenoviridae"[mh] OR "Sapovirus"[mh] OR "Aeromonas"[mh] OR "Diarrhea"[tw] OR "Diarrheas"[tw] OR "Diarrheal"[tw] OR "Diarrhoeal"[tw] OR "Diarrhoea"[tw] OR "Diarrhoeas"[tw] OR "Dysentery"[tw] OR "Dysentaria"[tw] OR "enteritis"[tw] OR "enteritides"[tw] OR "Cholera"[tw] OR "Choleras"[tw] OR "vibrioCholerae"[tw] OR "gastroenteritis"[tw] OR "gastroenteritides"[tw] OR "gastroduodenitis"[tw] OR "gastrointestinal acute infection"[tw] OR "gastrointestinal acute infections"[tw] OR "digestive tract infections"[tw] OR "digestive infection"[tw] OR "gastrointestinal tract infection"[tw] OR "gastrointestine tract infection"[tw] OR "rotavirus"[tw] OR "Escherichia coli"[tw] OR "salmonella"[tw] OR "Shigella"[tw] OR "campylobacter"[tw] OR "giardia lamblia"[tw] OR "vibrio cholerae"[tw] OR "cryptosporidium"[tw] OR "entamoeba histolytica"[tw] OR "norovirus"[tw] OR "calicivirus"[tw] OR "norwalk agent"[tw] OR "astrovirus"[tw] OR "coronavirus"[tw] OR "adenovirus"[tw] OR "sapovirus"[tw] OR "aeromonas"[tw] OR "avastarovirus"[tw]

3. Hospital

"Hospital"[mh] OR "Child, Hospitalized"[mh] OR "Hospitalization"[mh] OR "hospital"[tw] OR "in-patient"[tw] OR "hospitalization"[tw] OR "hospitalized"[tw]

## Web Appendix PRIMSA Checklist 2020

| Section and Topic             | Item # | Checklist item                                                                                                                                                                                                                                                                                       | Location where item is reported |
|-------------------------------|--------|------------------------------------------------------------------------------------------------------------------------------------------------------------------------------------------------------------------------------------------------------------------------------------------------------|---------------------------------|
| <b>TITLE</b>                  |        |                                                                                                                                                                                                                                                                                                      |                                 |
| Title                         | 1      | Identify the report as a systematic review.                                                                                                                                                                                                                                                          | Title                           |
| <b>ABSTRACT</b>               |        |                                                                                                                                                                                                                                                                                                      |                                 |
| Abstract                      | 2      | See the PRISMA 2020 for Abstracts checklist.                                                                                                                                                                                                                                                         | Done                            |
| <b>INTRODUCTION</b>           |        |                                                                                                                                                                                                                                                                                                      |                                 |
| Rationale                     | 3      | Describe the rationale for the review in the context of existing knowledge.                                                                                                                                                                                                                          | Page 2                          |
| Objectives                    | 4      | Provide an explicit statement of the objective(s) or question(s) the review addresses.                                                                                                                                                                                                               | P2                              |
| <b>METHODS</b>                |        |                                                                                                                                                                                                                                                                                                      |                                 |
| Eligibility criteria          | 5      | Specify the inclusion and exclusion criteria for the review and how studies were grouped for the syntheses.                                                                                                                                                                                          | P3                              |
| Information sources           | 6      | Specify all databases, registers, websites, organisations, reference lists and other sources searched or consulted to identify studies. Specify the date when each source was last searched or consulted.                                                                                            | P3                              |
| Search strategy               | 7      | Present the full search strategies for all databases, registers and websites, including any filters and limits used.                                                                                                                                                                                 | Appendix                        |
| Selection process             | 8      | Specify the methods used to decide whether a study met the inclusion criteria of the review, including how many reviewers screened each record and each report retrieved, whether they worked independently, and if applicable, details of automation tools used in the process.                     | P3                              |
| Data collection process       | 9      | Specify the methods used to collect data from reports, including how many reviewers collected data from each report, whether they worked independently, any processes for obtaining or confirming data from study investigators, and if applicable, details of automation tools used in the process. | P3                              |
| Data items                    | 10a    | List and define all outcomes for which data were sought. Specify whether all results that were compatible with each outcome domain in each study were sought (e.g. for all measures, time points, analyses), and if not, the methods used to decide which results to collect.                        | P3                              |
|                               | 10b    | List and define all other variables for which data were sought (e.g. participant and intervention characteristics, funding sources). Describe any assumptions made about any missing or unclear information.                                                                                         | P3                              |
| Study risk of bias assessment | 11     | Specify the methods used to assess risk of bias in the included studies, including details of the tool(s) used, how many reviewers assessed each study and whether they worked independently, and if applicable, details of automation tools used in the process.                                    | P3                              |
| Effect measures               | 12     | Specify for each outcome the effect measure(s) (e.g. risk ratio, mean difference) used in the synthesis or presentation of results.                                                                                                                                                                  | P3                              |
| Synthesis methods             | 13a    | Describe the processes used to decide which studies were eligible for each synthesis (e.g. tabulating the study intervention characteristics and comparing against the planned groups for each synthesis (item #5)).                                                                                 | P3                              |
|                               | 13b    | Describe any methods required to prepare the data for presentation or synthesis, such as handling of missing summary statistics, or data conversions.                                                                                                                                                | P3-5                            |
|                               | 13c    | Describe any methods used to tabulate or visually display results of individual studies and syntheses.                                                                                                                                                                                               | P5-6                            |

|                               |     |                                                                                                                                                                                                                                                                                      |                               |
|-------------------------------|-----|--------------------------------------------------------------------------------------------------------------------------------------------------------------------------------------------------------------------------------------------------------------------------------------|-------------------------------|
|                               | 13d | Describe any methods used to synthesize results and provide a rationale for the choice(s). If meta-analysis was performed, describe the model(s), method(s) to identify the presence and extent of statistical heterogeneity, and software package(s) used.                          | P5-6                          |
|                               | 13e | Describe any methods used to explore possible causes of heterogeneity among study results (e.g. subgroup analysis, meta-regression).                                                                                                                                                 | P5-6                          |
|                               | 13f | Describe any sensitivity analyses conducted to assess robustness of the synthesized results.                                                                                                                                                                                         | Appendix                      |
| Reporting bias assessment     | 14  | Describe any methods used to assess risk of bias due to missing results in a synthesis (arising from reporting biases).                                                                                                                                                              | P3                            |
| Certainty assessment          | 15  | Describe any methods used to assess certainty (or confidence) in the body of evidence for an outcome.                                                                                                                                                                                | P5-6                          |
| <b>RESULTS</b>                |     |                                                                                                                                                                                                                                                                                      |                               |
| Study selection               | 16a | Describe the results of the search and selection process, from the number of records identified in the search to the number of studies included in the review, ideally using a flow diagram.                                                                                         | P3, Figure 1, Appendix figure |
|                               | 16b | Cite studies that might appear to meet the inclusion criteria, but which were excluded, and explain why they were excluded.                                                                                                                                                          | PRISMA figure                 |
| Study characteristics         | 17  | Cite each included study and present its characteristics.                                                                                                                                                                                                                            | Not done                      |
| Risk of bias in studies       | 18  | Present assessments of risk of bias for each included study.                                                                                                                                                                                                                         | Not done                      |
| Results of individual studies | 19  | For all outcomes, present, for each study: (a) summary statistics for each group (where appropriate) and (b) an effect estimate and its precision (e.g. confidence/credible interval), ideally using structured tables or plots.                                                     | Not done                      |
| Results of syntheses          | 20a | For each synthesis, briefly summarise the characteristics and risk of bias among contributing studies.                                                                                                                                                                               | No done                       |
|                               | 20b | Present results of all statistical syntheses conducted. If meta-analysis was done, present for each the summary estimate and its precision (e.g. confidence/credible interval) and measures of statistical heterogeneity. If comparing groups, describe the direction of the effect. | P6-7                          |
|                               | 20c | Present results of all investigations of possible causes of heterogeneity among study results.                                                                                                                                                                                       | Tables 1-3                    |
|                               | 20d | Present results of all sensitivity analyses conducted to assess the robustness of the synthesized results.                                                                                                                                                                           | Appendix                      |
| Reporting biases              | 21  | Present assessments of risk of bias due to missing results (arising from reporting biases) for each synthesis assessed.                                                                                                                                                              | Not done                      |
| Certainty of evidence         | 22  | Present assessments of certainty (or confidence) in the body of evidence for each outcome assessed.                                                                                                                                                                                  | P6-7                          |
| <b>DISCUSSION</b>             |     |                                                                                                                                                                                                                                                                                      |                               |
| Discussion                    | 23a | Provide a general interpretation of the results in the context of other evidence.                                                                                                                                                                                                    | P7-9                          |
|                               | 23b | Discuss any limitations of the evidence included in the review.                                                                                                                                                                                                                      | P8-9                          |
|                               | 23c | Discuss any limitations of the review processes used.                                                                                                                                                                                                                                | P8-9                          |
|                               | 23d | Discuss implications of the results for practice, policy, and future research.                                                                                                                                                                                                       | P7-9                          |
| <b>OTHER INFORMATION</b>      |     |                                                                                                                                                                                                                                                                                      |                               |
| Registration and              | 24a | Provide registration information for the review, including register name and registration number, or state that the review was not                                                                                                                                                   | Not done                      |

|                                                |     |                                                                                                                                                                                                                                            |                                                        |
|------------------------------------------------|-----|--------------------------------------------------------------------------------------------------------------------------------------------------------------------------------------------------------------------------------------------|--------------------------------------------------------|
| protocol                                       |     | registered.                                                                                                                                                                                                                                |                                                        |
|                                                | 24b | Indicate where the review protocol can be accessed, or state that a protocol was not prepared.                                                                                                                                             | Not done                                               |
|                                                | 24c | Describe and explain any amendments to information provided at registration or in the protocol.                                                                                                                                            | Not done                                               |
| Support                                        | 25  | Describe sources of financial or non-financial support for the review, and the role of the funders or sponsors in the review.                                                                                                              | Gates, no role                                         |
| Competing interests                            | 26  | Declare any competing interests of review authors.                                                                                                                                                                                         | None                                                   |
| Availability of data, code and other materials | 27  | Report which of the following are publicly available and where they can be found: template data collection forms; data extracted from included studies; data used for all analyses; analytic code; any other materials used in the review. | Data of individual studies and analytic code on github |

*From:* Page MJ, McKenzie JE, Bossuyt PM, Boutron I, Hoffmann TC, Mulrow CD, et al. The PRISMA 2020 statement: an updated guideline for reporting systematic reviews. *BMJ* 2021;372:n71. doi: 10.1136/bmj.n71

For more information, visit:

<http://www.prisma-statement.org/>

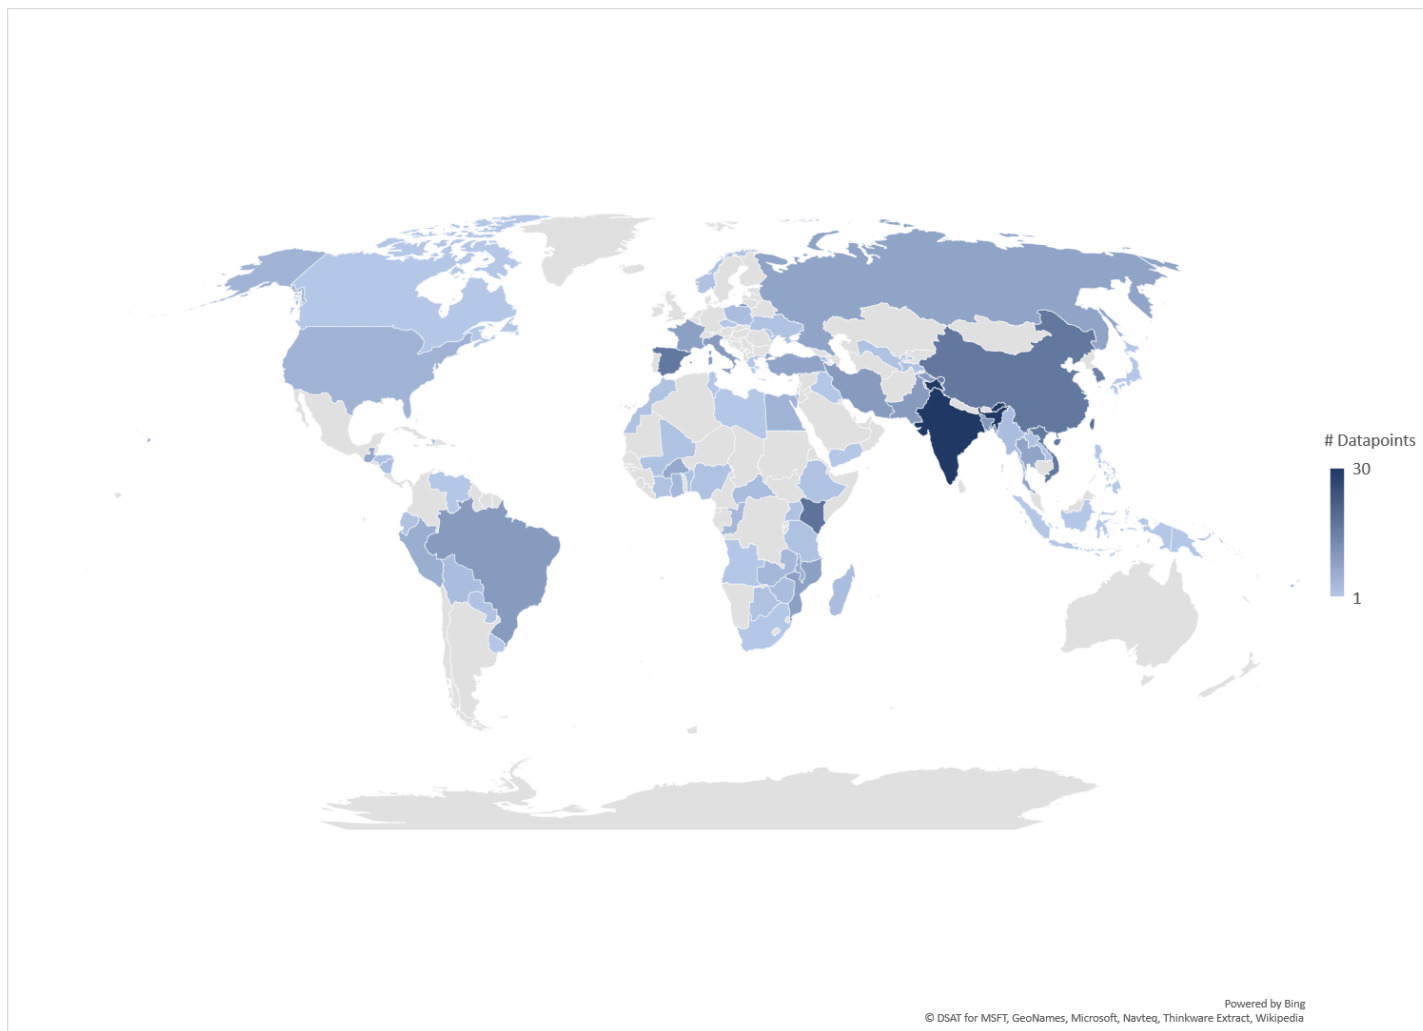

**Web appendix Figure 1. Location of included studies**

**Web Appendix Table 1. Description of study (input) data by country income level**

|                                    | Number of studies | Number of diarrhea cases |
|------------------------------------|-------------------|--------------------------|
| From High Income Countries         | 47                | 230088                   |
| From Low & Middle Income Countries | 91                | 66194                    |

**Web Appendix Table 2. Choice of GEMS or MAL-ED datasets for scalar derivation for each pathogen**

| Pathogen                         | Dataset used for scalar | GEMS conventional diagnostic type                                                                | MAL-ED conventional diagnostic type                                                             | Notes                                          |
|----------------------------------|-------------------------|--------------------------------------------------------------------------------------------------|-------------------------------------------------------------------------------------------------|------------------------------------------------|
| Adenovirus 40/41                 | MAL-ED                  | Nested EIA (adenovirus followed by adenovirus 40/41)                                             | EIA                                                                                             | Direct detection by EIA is more representative |
| Astrovirus                       | MAL-ED                  | Endpoint PCR                                                                                     | EIA                                                                                             | EIA is more representative                     |
| <i>Campylobacter jejuni/coli</i> | GEMS                    | Culture                                                                                          | Culture                                                                                         |                                                |
| <i>Cryptosporidium sp</i>        | GEMS                    | EIA                                                                                              | EIA                                                                                             |                                                |
| Norovirus GII                    | GEMS                    | Endpoint PCR                                                                                     | N/A (qPCR)                                                                                      |                                                |
| Rotavirus                        | GEMS                    | EIA                                                                                              | EIA                                                                                             |                                                |
| <i>Salmonella sp</i>             | GEMS                    | Culture                                                                                          | Culture                                                                                         |                                                |
| Sapovirus                        | GEMS                    | Endpoint PCR                                                                                     | Not tested                                                                                      |                                                |
| <i>Shigella sp</i>               | GEMS                    | Culture                                                                                          | Culture                                                                                         |                                                |
| ST-ETEC                          | GEMS                    | Culture, picking of three <i>E. coli</i> colonies, and endpoint PCR for detection of STh         | Culture, picking of five <i>E. coli</i> colonies, and endpoint PCR for detection of STh and STp |                                                |
| Typical EPEC                     | GEMS                    | Culture, picking of three <i>E. coli</i> colonies, and endpoint PCR for detection of <i>bfpA</i> | Culture, picking of five <i>E. coli</i> colonies, and endpoint PCR for detection of <i>bfpA</i> |                                                |
| <i>Vibrio cholerae</i>           | GEMS                    | Culture                                                                                          | Culture                                                                                         |                                                |



**Web Appendix Table 3. Description of diagnostic methods in study (input) data**

|                                  | Total Studies reporting | Diagnostic method – N (%) studies |              |          |
|----------------------------------|-------------------------|-----------------------------------|--------------|----------|
|                                  |                         | Attributable fraction             | Conventional | qPCR     |
| Rotavirus                        | 120*                    | 4 (3%)                            | 96 (80%)     | 19 (16%) |
| Norovirus GII                    | 47                      | 3(6%)                             | 16 (34%)     | 28 (60%) |
| Adenovirus 40/41                 | 26                      | 3 (12%)                           | 14 (54%)     | 9 (35%)  |
| ST-ETEC                          | 11                      | 4 (36%)                           | 1 (9%)       | 6 (55%)  |
| <i>Shigella sp</i>               | 56                      | 2 (4%)                            | 44 (79%)     | 10 (18%) |
| <i>Cryptosporidium sp</i>        | 25                      | 4 (16%)                           | 14 (56%)     | 7 (28%)  |
| Sapovirus                        | 34                      | 3 (9%)                            | 17 (50%)     | 14 (41%) |
| Astrovirus                       | 60                      | 3 (5%)                            | 45 (75%)     | 12 (2%)  |
| <i>Campylobacter jejuni/coli</i> | 53                      | 3 (6%)                            | 39 (74%)     | 11 (21%) |
| Typical EPEC                     | 13                      | 4 (31%)                           | 4 (31%)      | 5 (38%)  |
| <i>Vibrio cholerae</i>           | 20                      | 2 (10%)                           | 12 (60%)     | 6 (30%)  |
| <i>Salmonella sp</i>             | 65*                     | 3 (5%)                            | 49 (75%)     | 12 (18%) |

\*includes a study where the diagnostic method was not specified

**Web Appendix Figure 2. Comparison of before and after scalars**

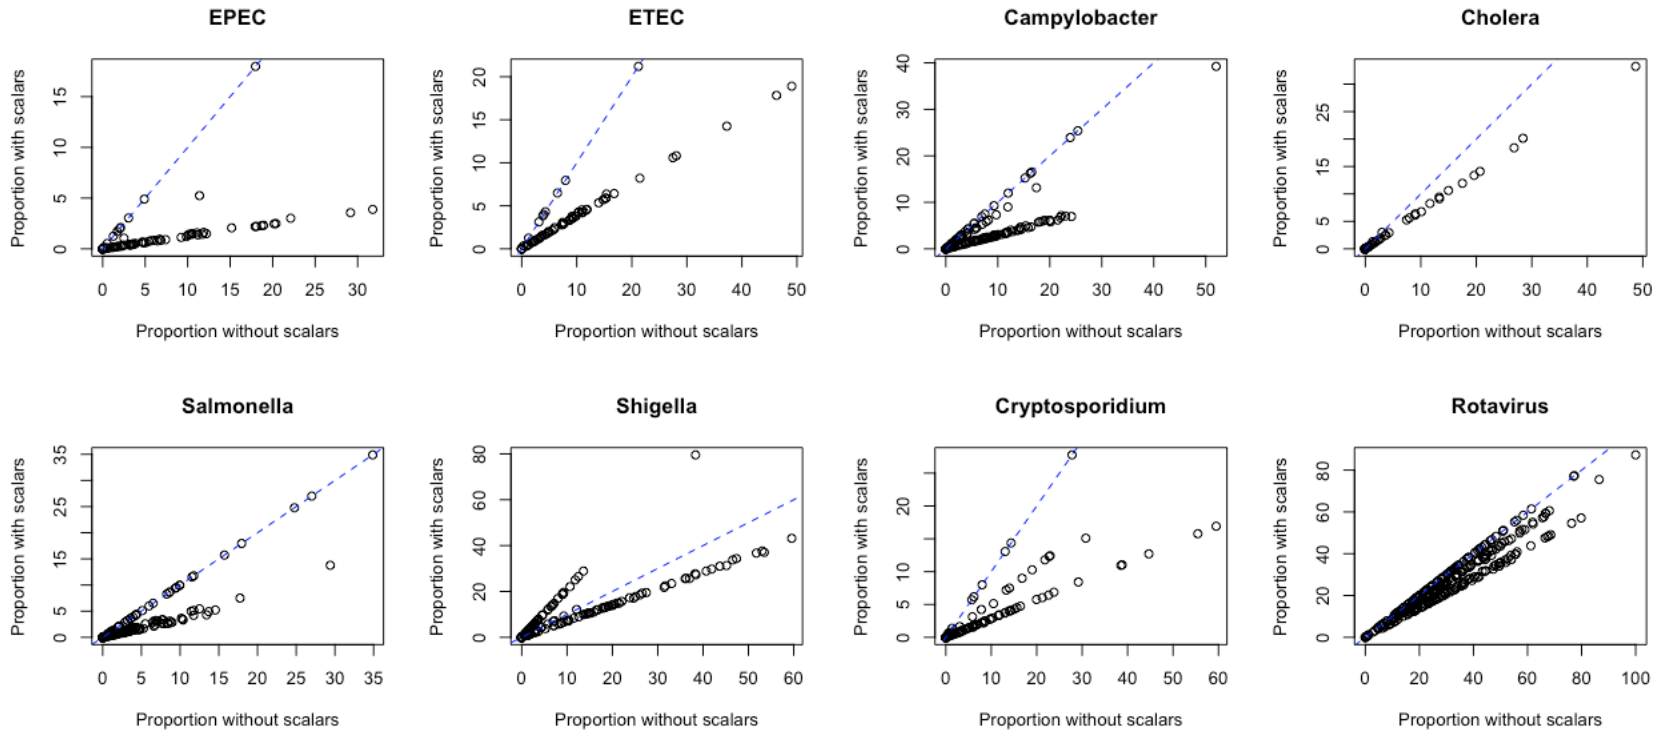

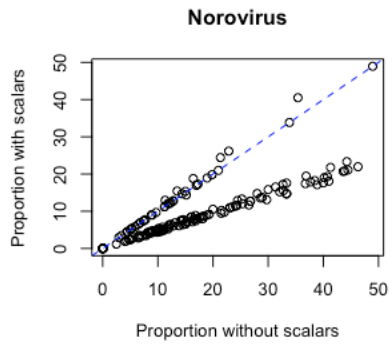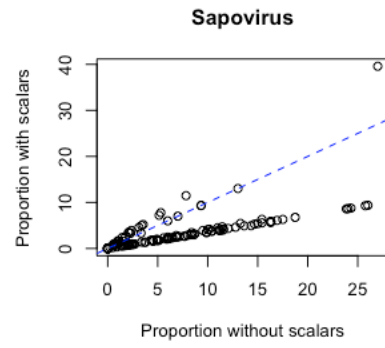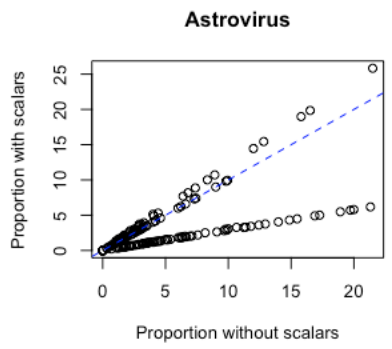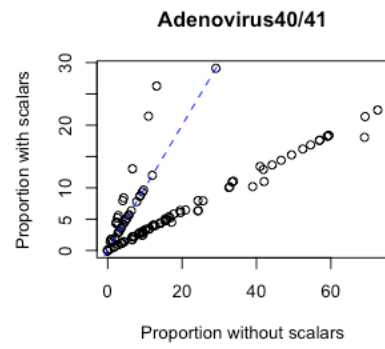

## Web Appendix Statistical Methods. Details related to statistical methods

We examined additional covariates other than those included in our final Bayesian models, including year and under five mortality rate, with similar results (not shown). However, these additional covariates were not included due to high collinearity. Due to the large number of etiologies considered here, each additional covariate results in a considerable increase in the number of parameters to estimate. Unfortunately, some factors of interest were not reported in a systematic way among the literature identified in the systematic review, including diarrhea case definition, sampling method, and antibiotic usage. We did not examine indicators of healthcare access. The models included generally uninformative priors.

The coefficients in the Bayesian multinomial regression were estimated using the mean of the Markov Chain Monte Carlo estimates after a burn in period of 5000 iterations (for LMIC) and 10000 iterations (for HIC). For each country in each year, that country's region, rotavirus vaccine coverage, and GNI were used in a linear combination with these estimated coefficients for each pathogen, which was exponentiated for each pathogen and the residual "other" etiologies, scaled by the sum of these, to yield an estimated fraction of diarrhea deaths having values between zero and 1. This estimated fraction was applied to the estimated number of diarrhea deaths in each country year as previously reported, for the number of deaths for each pathogen in each country-year.

Overfitting in the Bayesian model was controlled using the Bayesian LASSO and the restriction parameter ( $\lambda$ ). We selected a moderate amount of restriction for both the high income and low-income models. We did not use cross validation to select the degree of restriction. In order to determine convergence of the Bayesian models, we examined the trace plots of estimated parameters, as well as the Gelman R statistic being less than 1.1. Trace plots are included below as Webappendix figures 4 and 5.

All input data and scripts related to statistical analysis are available at [https://github.com/jamieperin/diarrhea\\_etiology](https://github.com/jamieperin/diarrhea_etiology).

Gelman A, Rubin DB. Inference from iterative simulation using multiple sequences. *Statistical science*. 1992 Nov;7(4):457-72.

### Jags model definition:

```
model{
  for (s in 1:S){ # loop through studies

    ## Define model for each TRUE etiology
    # C number of TRUE etiology
    # q is log(odds) for each etiology: log(Pi/P1) where i = 1...C
```

```

q[s,1] <- 1
for(d in 2:C){
  log(q[s,d]) <- inprod(XM[s,1:K],B[1:K,d])
}
pi[s,1:C] <- q[s,1:C] / sum(q[s,1:C])

P[fi[s]:la[s]] <- GM[fi[s]:la[s], 1:C] %*% pi[s,]

## Multinomial model of observed numbers in reported categories from expected proportions
GM[fi[s]:la[s], C+1] ~ dmultinom(P[fi[s]:la[s]], N[s])
}

# Define priors
for(c in 2:C){
  B[1,c] ~ dnorm(0,1/0.5^2)
  for(x in 1:K){
    B[x,c] ~ ddexp(0,lambda)
  }
}
}

```

Web Appendix Figure 3. Model coefficient estimates

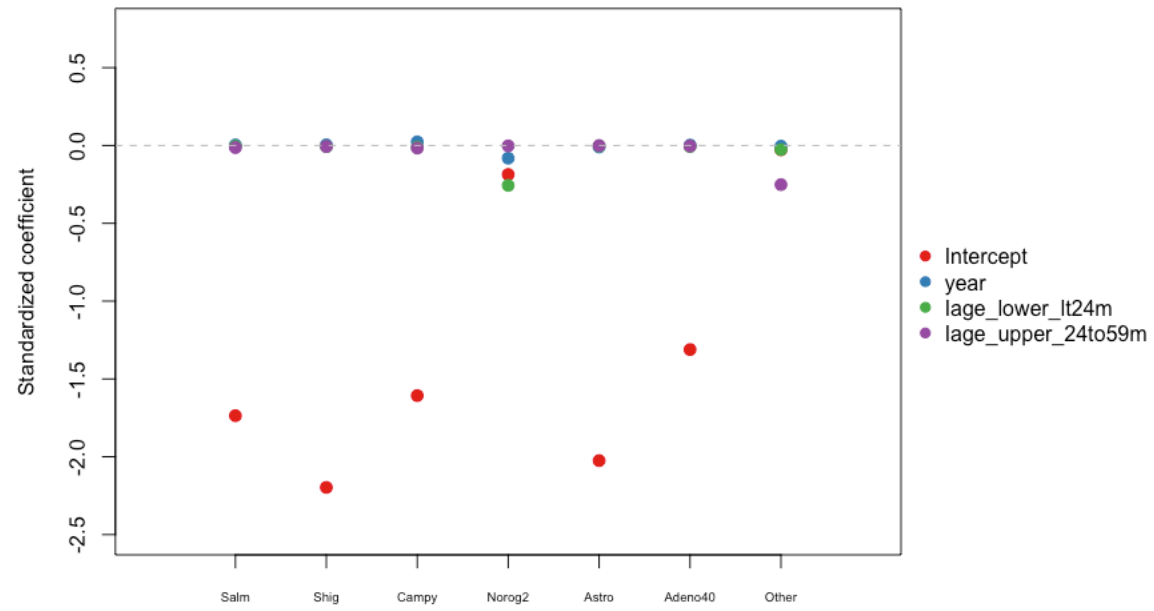

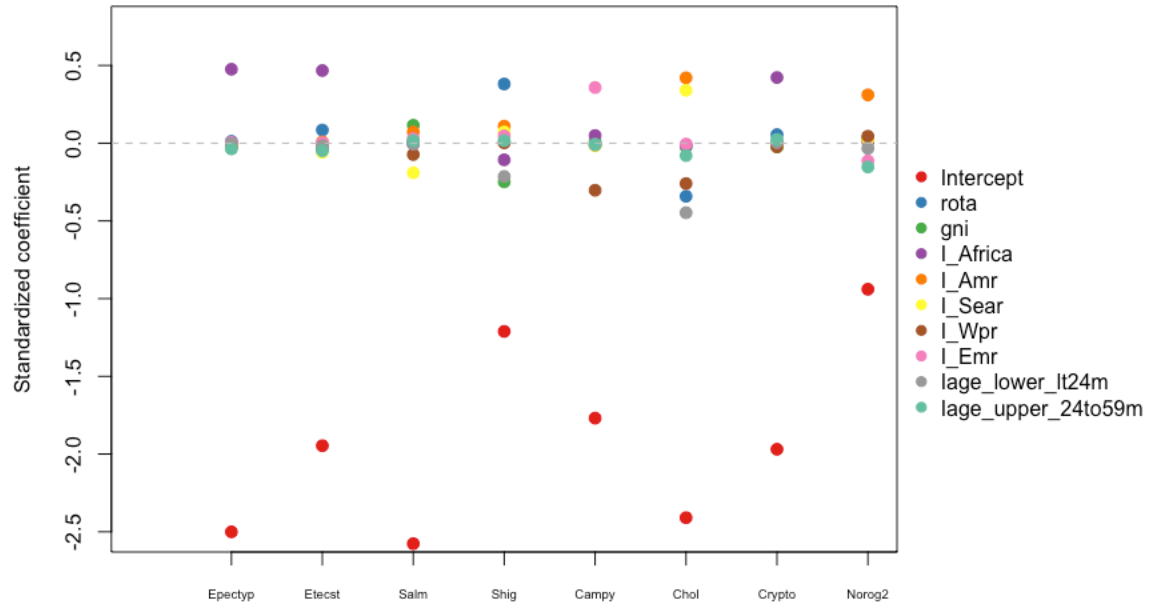

Web Appendix Figure 4. Convergence for high income model.

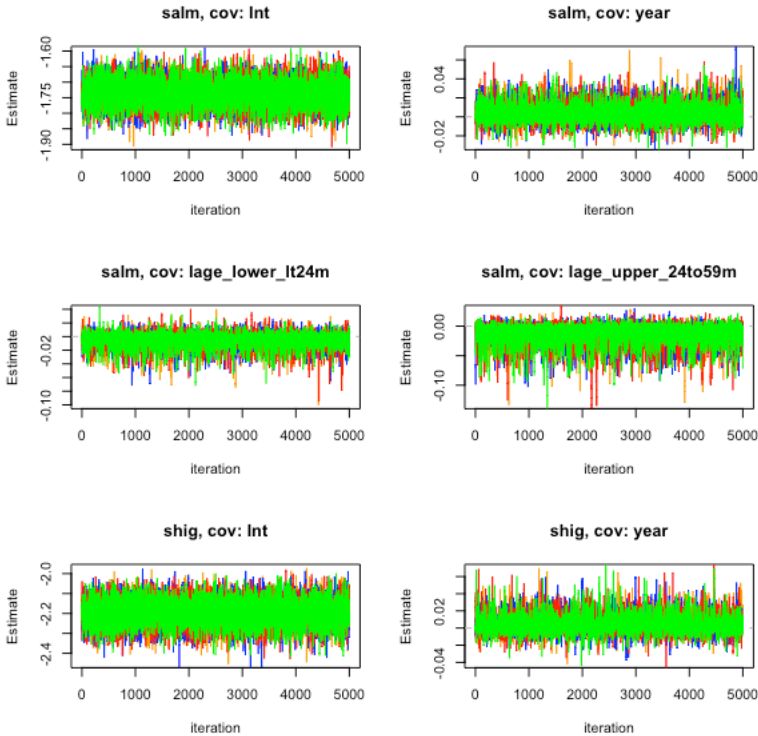



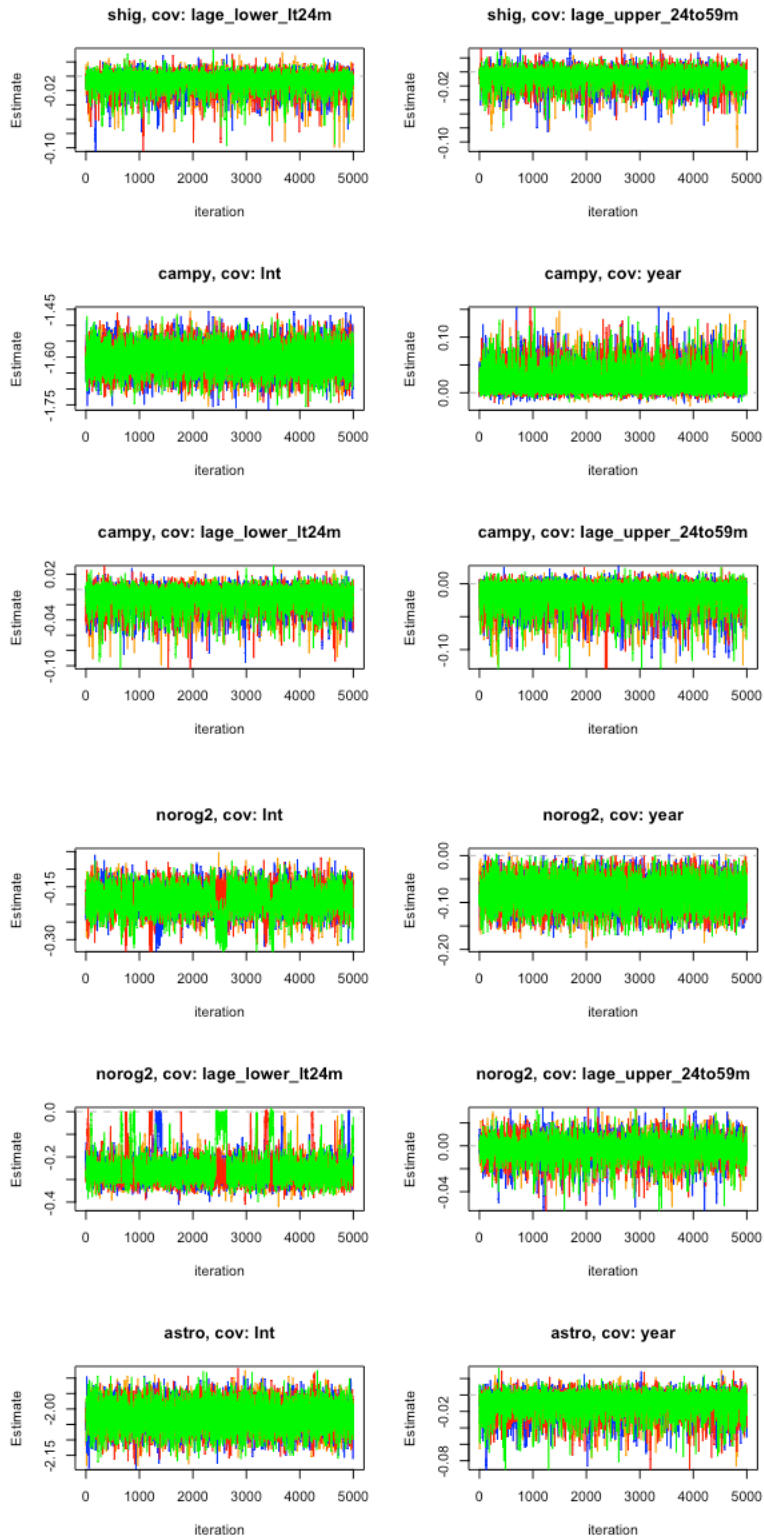

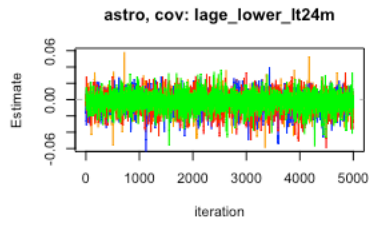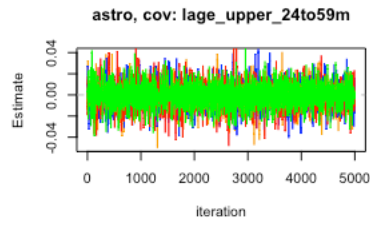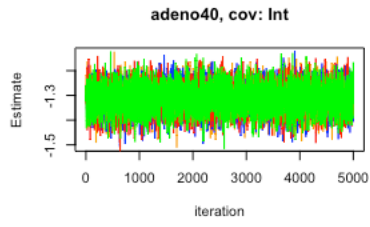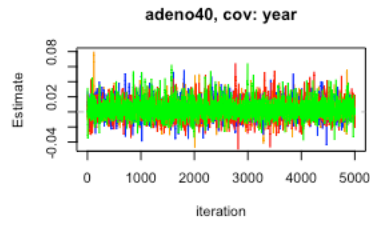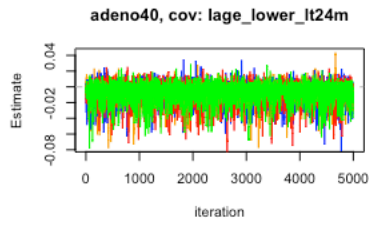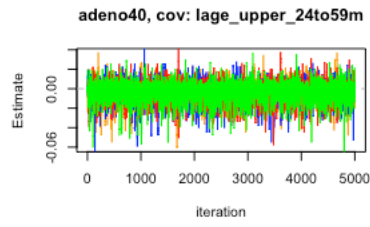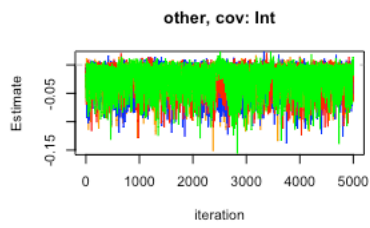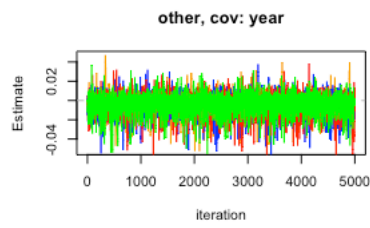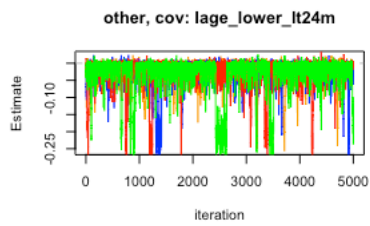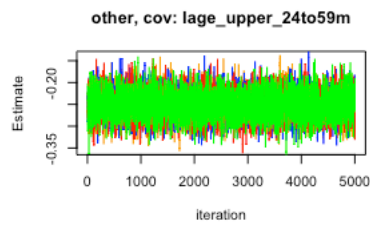

Web Appendix Figure 5. Convergence for low and middle-income model.

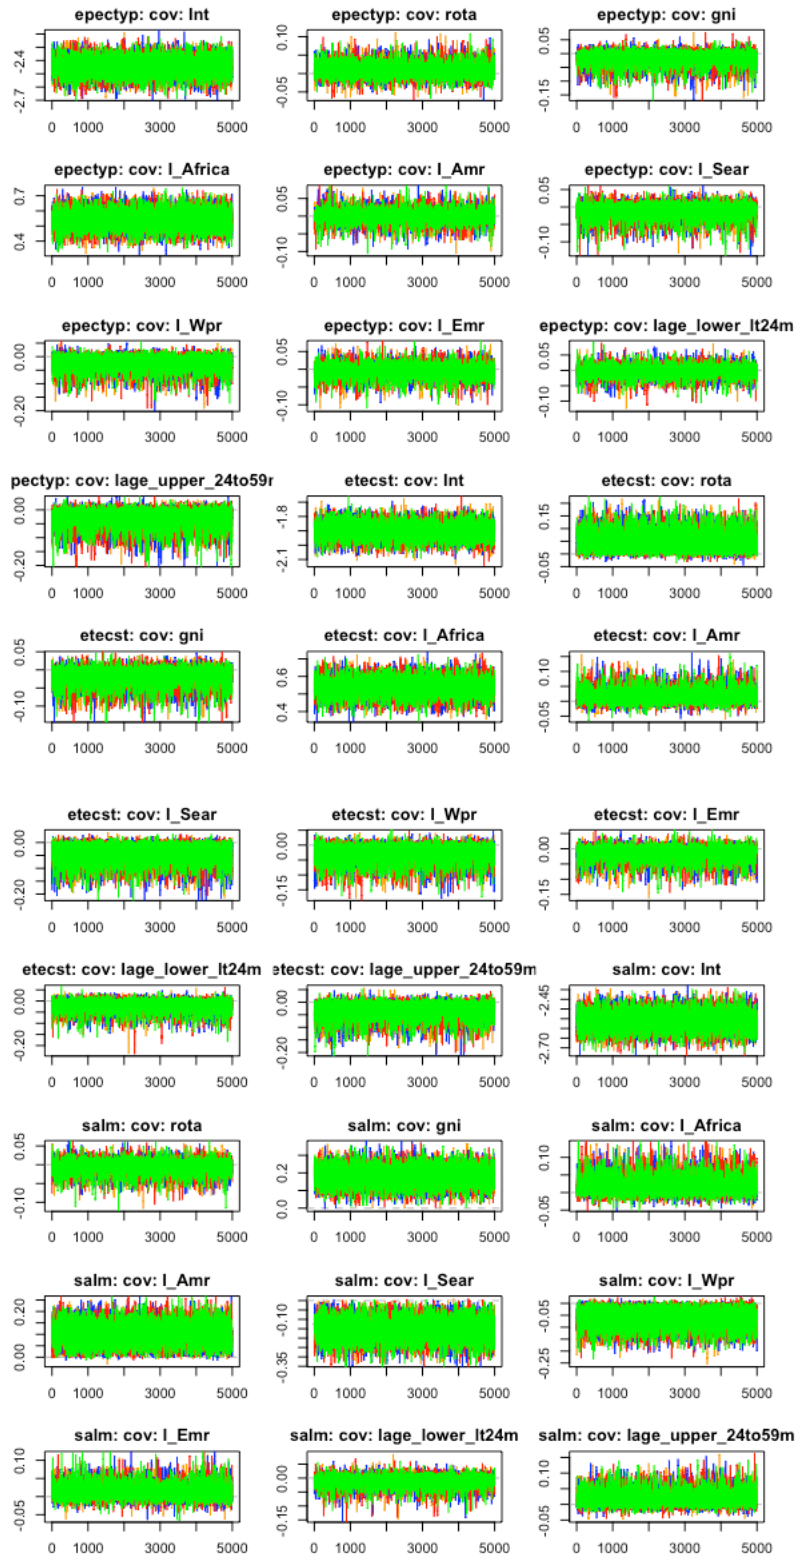

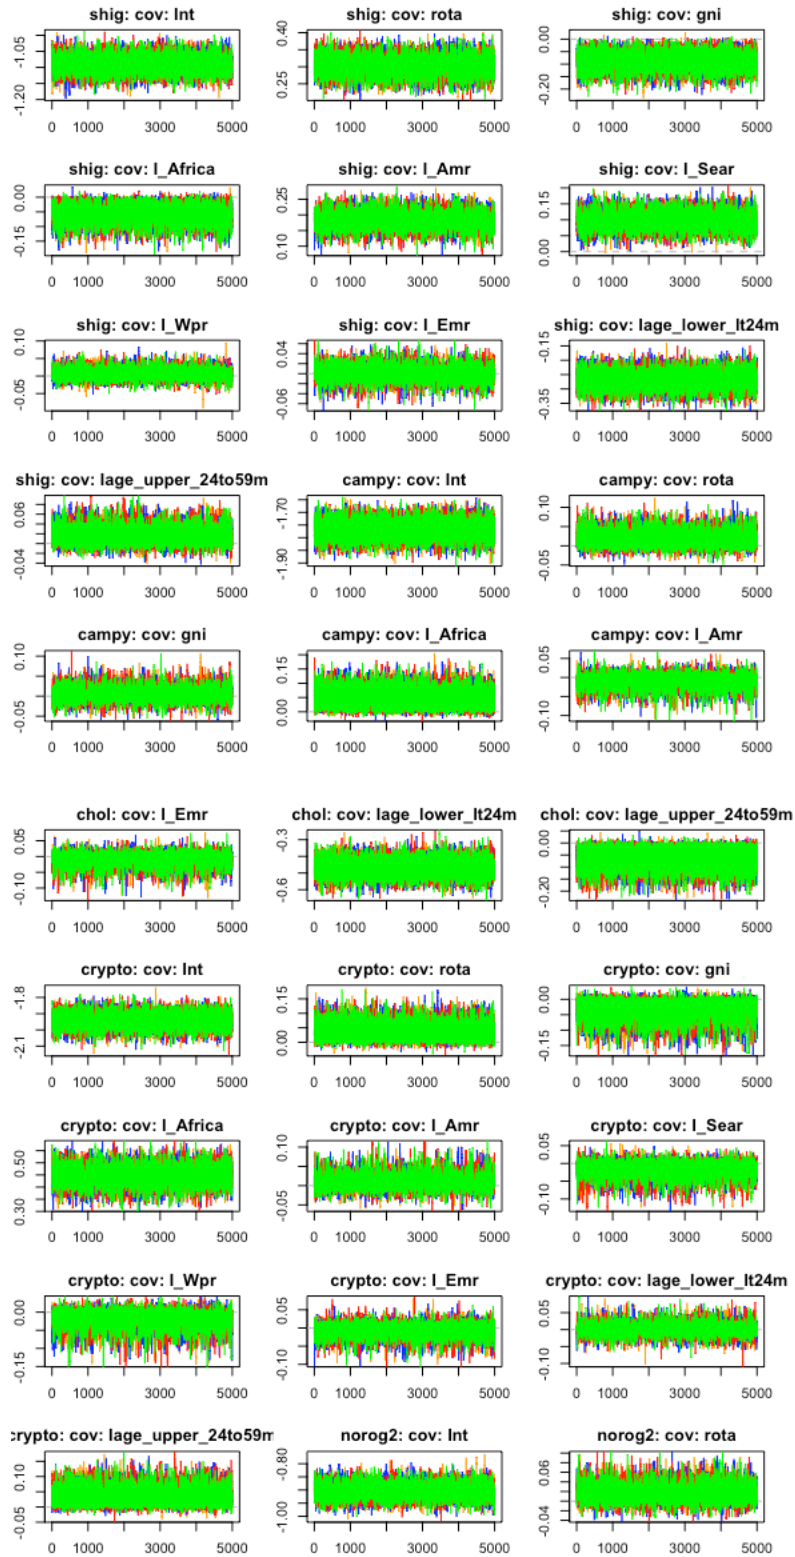

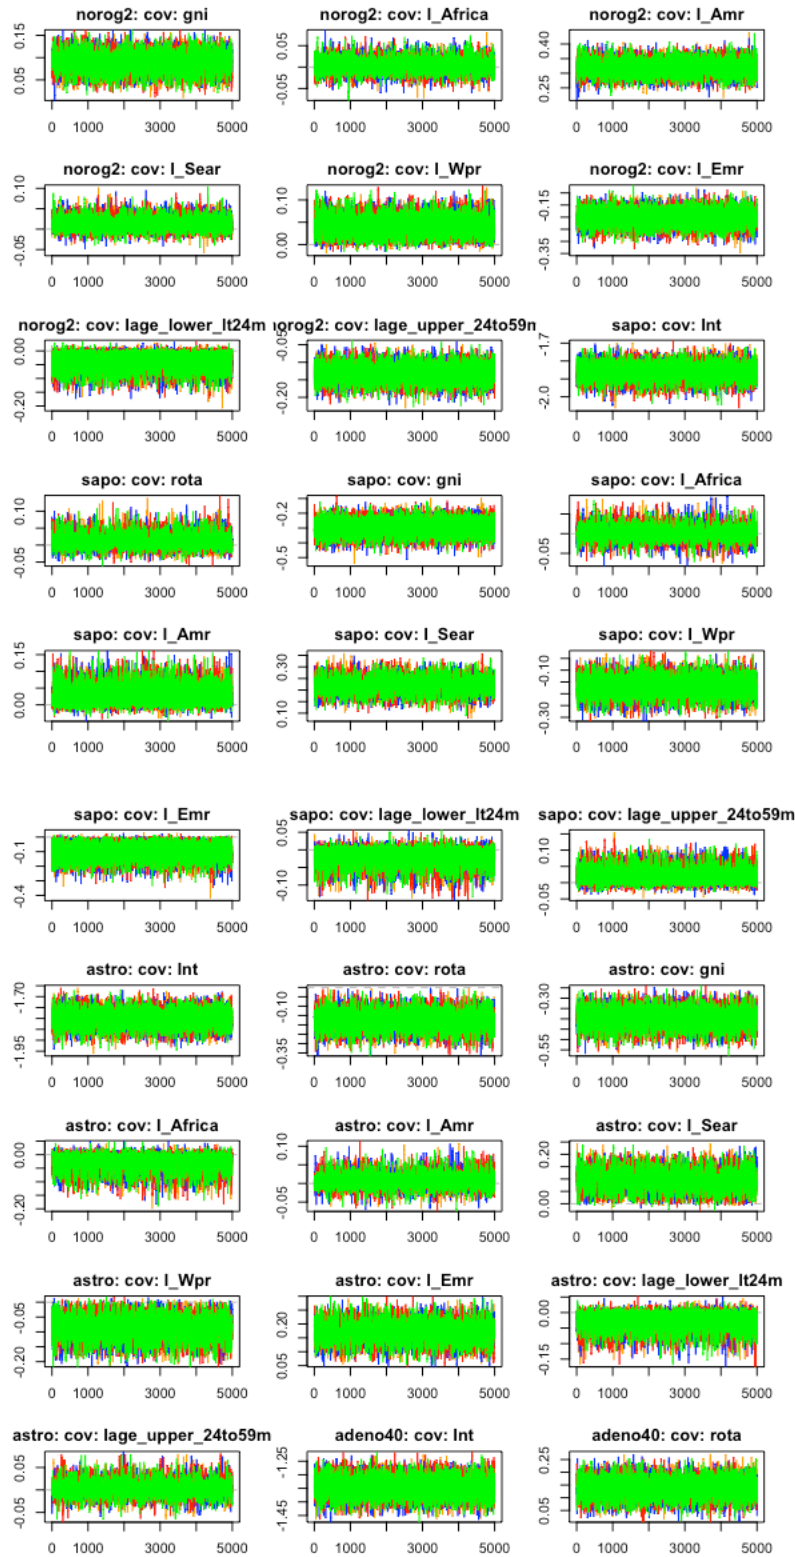

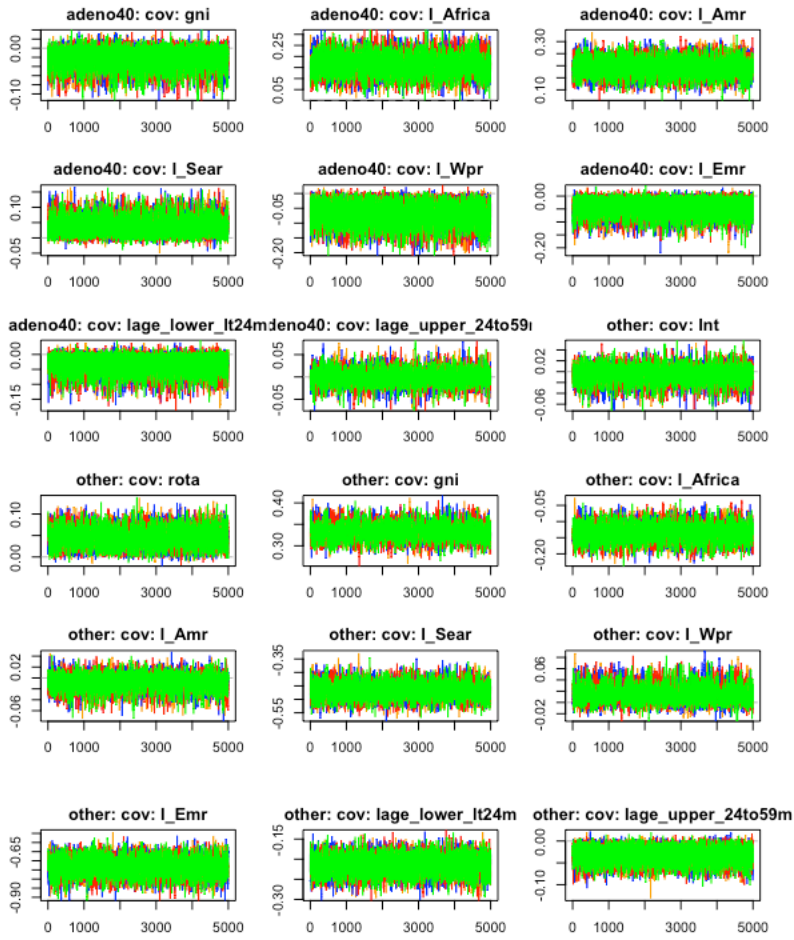

**Web Appendix Table 4. Comparison of Previous<sup>6,11,25</sup> and current estimates of the etiologies of diarrhea deaths**

| Cause                            | 2011*<br>Lanata <sup>6</sup><br>(%) | 2017-18 †<br>Cohen <sup>11</sup><br>(%) | 2019‡<br>GBD <sup>25</sup><br>(%) | 2021§<br>Black<br>(%) |
|----------------------------------|-------------------------------------|-----------------------------------------|-----------------------------------|-----------------------|
| Rotavirus                        | 27·8                                | 35·7                                    | 30·3                              | 24·4                  |
| <i>Shigella sp</i>               | 3·9                                 | 10·8                                    | 18·7                              | 8·1                   |
| Norovirus                        | 9·9                                 | 6·2¶                                    | -                                 | 7·4¶                  |
| Adenovirus 40/41                 | 3·1                                 | 3·9                                     | 16·7                              | 7·4                   |
| ETEC                             | 6·0                                 | 3·9¶                                    | 2·5                               | 6·4¶                  |
| <i>Cryptosporidium sp</i>        | 2·0                                 | 3·4                                     | 15·4                              | 5·8                   |
| <i>Campylobacter jejuni/coli</i> | 3·2                                 | 1·7                                     | 11·8                              | 5·5                   |
| Astrovirus                       | 2·1                                 | 3·0                                     | -                                 | 4·8                   |
| Sapovirus                        | -                                   | 3·9¶                                    | -                                 | 4·7¶                  |
| EPEC                             | 11·1                                | -                                       | 3·2                               | 3·7                   |
| <i>Salmonella sp</i>             | 2·5                                 | 1·0                                     | 7·9                               | 1·8                   |
| <i>Vibrio cholerae</i>           | 1·3                                 | -                                       | 11·3                              | 1·4                   |
| Other                            | 24·5                                | 27·4                                    | -                                 | 18·7                  |

\*Year for which estimates done

†Total of estimated causes exceeds 2017-18 total diarrhea deaths by 3·3%

‡Total of estimated causes exceeds 2019 total diarrhea deaths by 26%

§Total of estimated causes exceeds 2021 total diarrhea deaths by 0·1% due to rounding

¶Restricted to norovirus GII, ST-EPEC and typical EPEC
